# Supplementary material for: Viral infection and transmission in a large, well-traced outbreak caused by the SARS-CoV-2 Delta variant
Source: bioRxiv or medRxiv preprint supplement (doi:10.1101/2021.07.07.21260122), 2021-07-23
Supplement: Supplementary file [file media-1.pdf]

Table S1 iSNV pair transmission

| Transmission_pairs | iSNVs<br>(donor) | iSNVs<br>(recipient) | Transmitted iSNVs* |
|--------------------|------------------|----------------------|--------------------|
| pair 1             | 3                | 2                    | 1                  |
| pair 2             | 3                | 2                    | 1                  |
| pair 3             | 3                | 1                    | 1                  |
| pair 4             | 19               | 3                    | 0                  |
| pair 5             | 1                | 4                    | 0                  |
| pair 6             | 1                | 49                   | 0                  |
| pair 7             | 1                | 0                    | 0                  |
| pair 8             | 1                | 44                   | 0                  |
| pair 9             | 1                | 44                   | 0                  |
| pair 10            | 1                | 2                    | 0                  |
| pair 11            | 21               | 2                    | 0                  |
| pair 12            | 3                | 5                    | 0                  |
| pair 13            | 3                | 0                    | 0                  |
| pair 14            | 21               | 0                    | 0                  |
| pair 15            | 21               | 5                    | 0                  |
| pair 16            | 21               | 1                    | 0                  |
| pair 17            | 21               | 19                   | 0                  |
| pair 18            | 21               | 3                    | 0                  |
| pair 19            | 21               | 6                    | 1                  |
| pair 20            | 21               | 25                   | 0                  |
| pair 21            | 3                | 0                    | 0                  |
| pair 22            | 3                | 5                    | 0                  |
| pair 23            | 3                | 1                    | 0                  |
| pair 24            | 3                | 19                   | 0                  |
| pair 25            | 3                | 3                    | 0                  |
| pair 26            | 3                | 6                    | 0                  |
| pair 27            | 3                | 25                   | 0                  |
| pair 28            | 1                | 1                    | 0                  |
| pair 29            | 1                | 0                    | 0                  |
| pair 30            | 1                | 2                    | 0                  |
| pair 31            | 1                | 5                    | 0                  |
| pair 32            | 1                | 1                    | 0                  |
| pair 33            | 1                | 1                    | 0                  |
| pair 34            | 1                | 0                    | 0                  |
| pair 35            | 1                | 3                    | 0                  |
| pair 36            | 1                | 2                    | 0                  |
| pair 37            | 1                | 0                    | 0                  |
| pair 38            | 1                | 0                    | 0                  |
| pair 39            | 1                | 2                    | 0                  |
| pair 40            | 1                | 1                    | 0                  |
| pair 41            | 1                | 2                    | 0                  |
| pair 42            | 1                | 0                    | 0                  |
| pair 43            | 1                | 2                    | 0                  |
| pair 44            | 44               | 2                    | 0                  |
| pair 45            | 6                | 3                    | 0                  |
| pair 46            | 6                | 3                    | 0                  |
| pair 47            | 6                | 8                    | 0                  |
| pair 48            | 6                | 1                    | 0                  |
| pair 49            | 6                | 1                    | 0                  |
| pair 50            | 6                | 4                    | 0                  |
| pair 51            | 25               | 1                    | 0                  |
| pair 52            | 25               | 6                    | 0                  |
| pair 53            | 25               | 2                    | 2                  |
| pair 54            | 25               | 1                    | 1                  |
| pair 55            | 25               | 0                    | 0                  |
| pair 56            | 25               | 15                   | 0                  |
| pair 57            | 25               | 2                    | 0                  |
| pair 58            | 25               | 1                    | 0                  |
| pair 59            | 25               | 2                    | 0                  |
| pair 60            | 5                | 1                    | 0                  |
| pair 61            | 1                | 3                    | 1                  |
| pair 62            | 1                | 4                    | 0                  |
| pair 63            | 1                | 4                    | 0                  |
| pair 64            | 2                | 1                    | 0                  |
| pair 65            | 2                | 3                    | 0                  |
| pair 66            | 2                | 0                    | 0                  |
| pair 67            | 1                | 2                    | 0                  |
| pair 68            | 1                | 1                    | 0                  |
| pair 69            | 1                | 2                    | 0                  |
| pair 70            | 1                | 3                    | 0                  |
| pair 71            | 4                | 3                    | 0                  |
| pair 72            | 1                | 3                    | 0                  |
| pair 73            | 4                | 0                    | 0                  |
| pair 74            | 4                | 4                    | 0                  |

\* Donor iSNVs could be found in recipient.

Figure S1

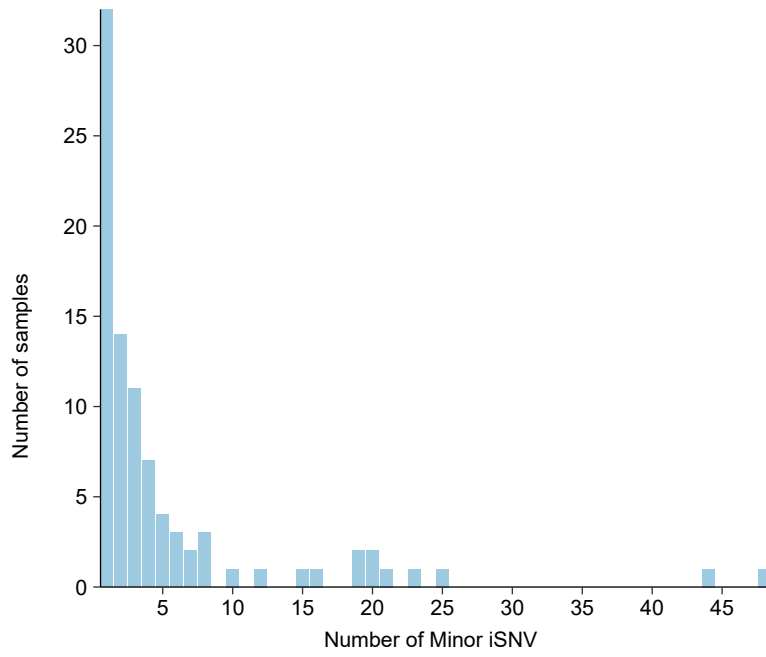

Supplemental figure S1.  
Histogram of the number of samples (y-axis) by the number of minor iSNV per sample (x-axis), n = 89.
